# Supplementary material
Source: PubMed Central journal article supplement (PMC3437655)
Supplement: NIHMS397378-supplement-1_si_001.pdf [file NIHMS397378-supplement-1_si_001.pdf]

A Chip-Capillary Hybrid Device for Automated  
Transfer of Sample Pre-Separated by Capillary  
Isoelectric Focusing to Parallel Capillary Gel  
Electrophoresis for Two-Dimensional Protein Separation

*Joann J. Lu,<sup>†</sup> Shili Wang,<sup>†</sup> Guanbin Li,<sup>‡</sup> Wei Wang,<sup>†</sup> Qiaosheng Pu<sup>§</sup> and Shaorong Liu<sup>†\*</sup>*

<sup>†</sup>Department of Chemistry and Biochemistry, University of Oklahoma, Norman, OK 73019, USA;

<sup>‡</sup>School of Petrochemical Engineering, Lanzhou University of Technology, Lanzhou, Gansu, 730050,

P.R. China; <sup>§</sup>Department of Chemistry, Lanzhou University, Lanzhou, Gansu, 730000, P.R. China.

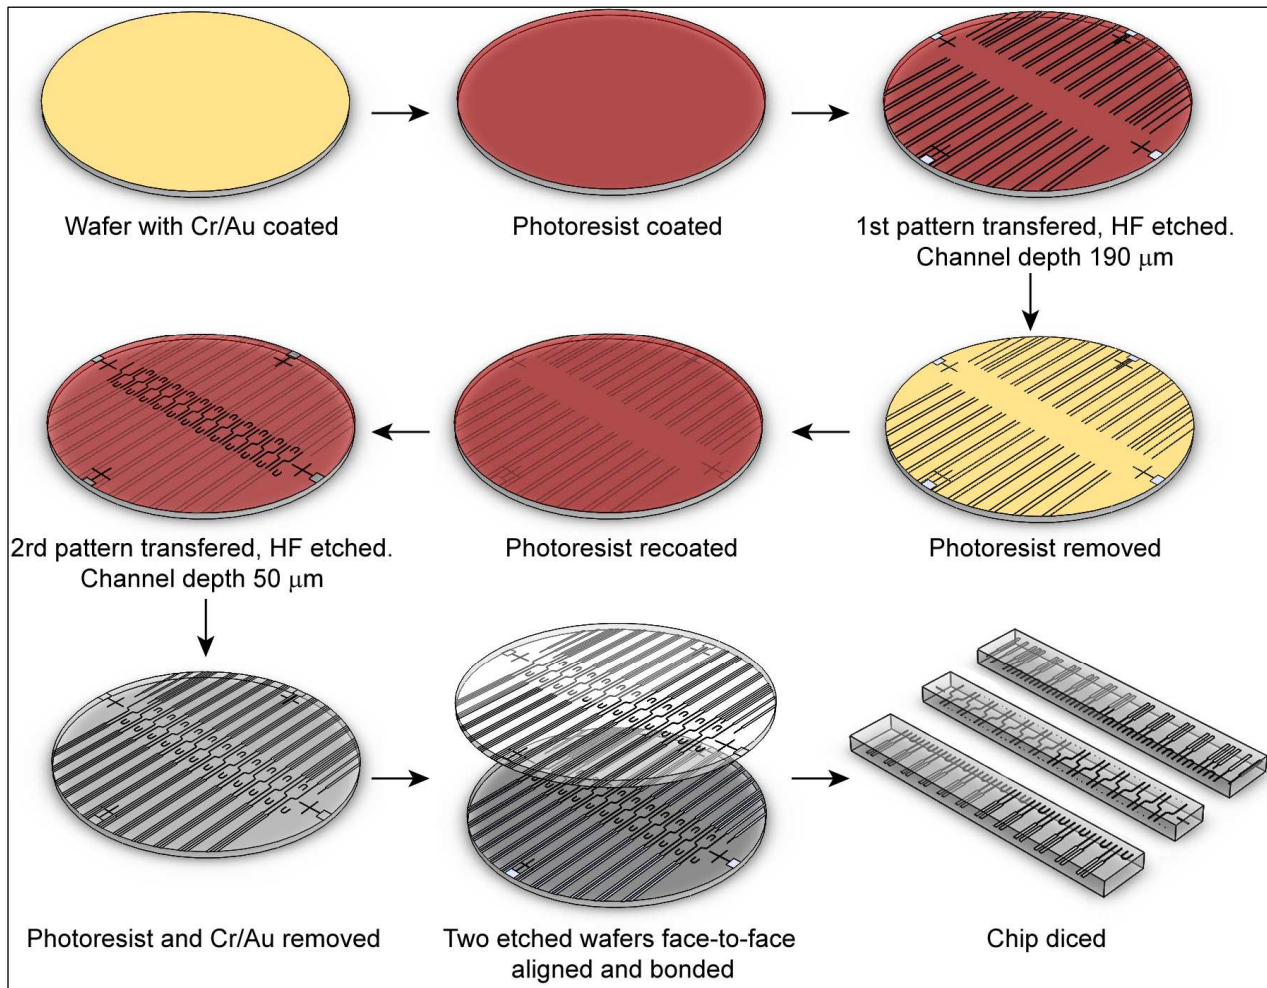

**Fig. S1. Detailed illustration of microchip fabrication.**

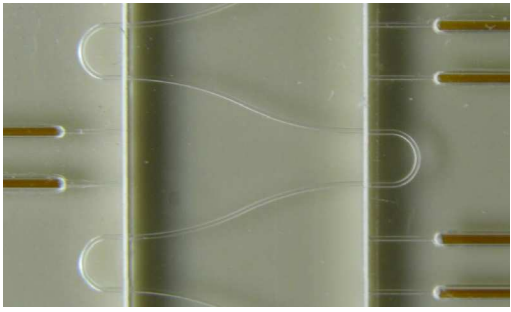

**(A)**

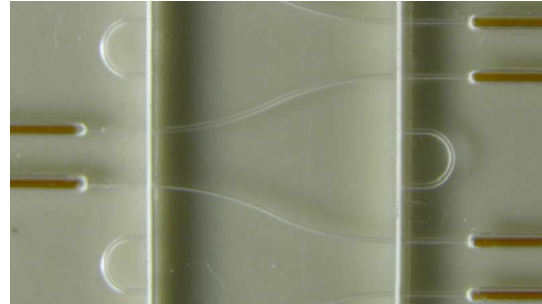

**(B)**

**Fig. S2.** Images of chip channel alignment

(A) Channels aligned for the 1st-D separation; and (B) channels aligned for parallel CGE (the 2nd-D) separations.
